# Supplementary material for: Effect of Intraoperative Esketamine Infusion on Postoperative Sleep Disturbance After Gynecological Laparoscopy: A Randomized Clinical Trial
Source: PubMed Central journal article supplement (PMC9716381; doi:10.1001/jamanetworkopen.2022.44514), 2022-12-01
Supplement: jamanetwopen-e2244514-s001.pdf [file jamanetwopen-e2244514-s001.pdf]

1 **Effect of operative esketamine infusion on postoperative sleep disturbance among**  
2 **patients undergoing gynecological laparoscopic surgery: a randomized clinical trial.**

3  
4 **Study Protocol**

5  
6  
7 **Clinical site:**

8 The First Affiliated Hospital of Zhengzhou University, Henan, China

9  
10 **Data management and statistical site:**

11 Department of Anesthesiology, Pain and Perioperative Medicine, The First Affiliated Hospital of  
12 Zhengzhou University, Henan, China

13  
14 **Data:**

15 Original protocol date: August, 2021

16 Final protocol date: April, 2022

17  
18  
19  
20  
21  
22  
23  
24  
25  
26  
27  
28  
29  
30  
31  
32  
33  
34  
35  
36  
37  
38  
39  
40  
41

## 42 Contents

|    |                                                                   |   |
|----|-------------------------------------------------------------------|---|
| 43 | 1 Committee composition .....                                     | 1 |
| 44 | 1.1 Protocol committee .....                                      | 1 |
| 45 | 1.2 Steering committee .....                                      | 1 |
| 46 | 1.3 Data coordination committee .....                             | 1 |
| 47 | 1.4 Publication committee .....                                   | 2 |
| 48 | 2 Study contacts and organizations .....                          | 2 |
| 49 | 2.1 Study contacts .....                                          | 2 |
| 50 | 2.2 Recruiting site .....                                         | 2 |
| 51 | 3 Background .....                                                | 2 |
| 52 | 4 Study hypotheses .....                                          | 3 |
| 53 | 5 Methodology .....                                               | 3 |
| 54 | 5.1 Study design .....                                            | 3 |
| 55 | 5.2 Randomization and blinding .....                              | 3 |
| 56 | 5.3 Sample size .....                                             | 3 |
| 57 | 5.4 Participant recruitment, screening and group assignment ..... | 4 |
| 58 | 5.5 Inclusion criteria .....                                      | 4 |
| 59 | 5.8 Exclusion criteria .....                                      | 4 |
| 60 | 6 Outcome measurement .....                                       | 5 |
| 61 | 6.1 Primary outcome .....                                         | 5 |
| 62 | 6.2 Secondary outcomes .....                                      | 5 |
| 63 | 7 Interventions .....                                             | 6 |
| 64 | 8 Anesthesia Technique .....                                      | 6 |
| 65 | 9 Quality control .....                                           | 6 |
| 66 | 10 Statistical analysis .....                                     | 6 |
| 67 | References .....                                                  | 7 |
| 68 |                                                                   |   |
| 69 |                                                                   |   |
| 70 |                                                                   |   |
| 71 |                                                                   |   |
| 72 |                                                                   |   |
| 73 |                                                                   |   |
| 74 |                                                                   |   |
| 75 |                                                                   |   |
| 76 |                                                                   |   |
| 77 |                                                                   |   |
| 78 |                                                                   |   |
| 79 |                                                                   |   |

80 **1 Committee composition**

81 **1.1 Protocol committee**

82

**Table 1 Protocol committee**

| <b>Name</b>     | <b>Affiliation</b>                                                                                                                              | <b>Email address</b>         |
|-----------------|-------------------------------------------------------------------------------------------------------------------------------------------------|------------------------------|
| Di Qiu          | The First Affiliated Hospital of Zhengzhou University                                                                                           | qd15136760769@163.com        |
| Xing-Ming Wang  | The First Affiliated Hospital of Zhengzhou University and Division of Clinical Neuroscience, Chiba University Center for Forensic Mental Health | xingmingwang@chiba-u.jp      |
| Jin-Jin Yang    | The First Affiliated Hospital of Zhengzhou University                                                                                           | 18845145049@163.com          |
| Sai Chen        | The First Affiliated Hospital of Zhengzhou University                                                                                           | 13781126313@163.com          |
| Cai-Bao Yue     | The First Affiliated Hospital of Zhengzhou University                                                                                           | Yuecb1987@163.com            |
| Kenji Hashimoto | Division of Clinical Neuroscience, Chiba University Center for Forensic Mental Health                                                           | hashimoto@faculty.chiba-u.jp |
| Jian-Jun Yang   | The First Affiliated Hospital of Zhengzhou University                                                                                           | yjyangjj@163.com             |

83

84 **1.2 Steering committee**

85

**Table 2 Steering committee**

| <b>Name</b>     | <b>Affiliation</b>                                                                                                                              | <b>Email address</b>         |
|-----------------|-------------------------------------------------------------------------------------------------------------------------------------------------|------------------------------|
| Di Qiu          | The First Affiliated Hospital of Zhengzhou University                                                                                           | qd15136760769@163.com        |
| Xing-Ming Wang  | The First Affiliated Hospital of Zhengzhou University and Division of Clinical Neuroscience, Chiba University Center for Forensic Mental Health | xingmingwang@chiba-u.jp      |
| Kenji Hashimoto | Division of Clinical Neuroscience, Chiba University Center for Forensic Mental Health                                                           | hashimoto@faculty.chiba-u.jp |
| Jian-Jun Yang   | The First Affiliated Hospital of Zhengzhou University                                                                                           | yjyangjj@163.com             |

86

87 **1.3 Data coordination committee**

88

**Table 3 Data coordination committee**

| <b>Name</b>    | <b>Affiliation</b>                                                                                                                              | <b>Email address</b>    |
|----------------|-------------------------------------------------------------------------------------------------------------------------------------------------|-------------------------|
| Di Qiu         | The First Affiliated Hospital of Zhengzhou University                                                                                           | qd15136760769@163.com   |
| Xing-Ming Wang | The First Affiliated Hospital of Zhengzhou University and Division of Clinical Neuroscience, Chiba University Center for Forensic Mental Health | xingmingwang@chiba-u.jp |
| Jin-Jin Yang   | The First Affiliated Hospital of Zhengzhou University                                                                                           | 18845145049@163.com     |
| Cai Chen       | The First Affiliated Hospital of Zhengzhou University                                                                                           | 13781126313@163.com     |
| Cai-Bao Yue    | The First Affiliated Hospital of Zhengzhou University                                                                                           | Yuecb1987@163.com       |

89

90 **1.4 Publication committee**

91 Members of the publication committee include Di Qiu, Xing-Ming Wang, Jin-Jin Yang, Sai  
92 Chen, Cai-Bao Yue, Kenji Hashimoto, Jian-Jun Yang.

93  
94  
95  
96  
97  
98  
99  
100  
101  
102  
103  
104  
105  
106  
107  
108  
109  
110  
111  
112  
113  
114  
115  
116  
117  
118  
119  
120  
121  
122  
123  
124  
125  
126  
127  
128  
129  
130  
131  
132  
133

## **2 Study contacts and organizations**

### **2.1 Study contacts**

#### **Principal investigator for trial**

Jian-Jun Yang, MD PhD

Department of Anesthesiology, Pain and Perioperative Medicine, The First Affiliated Hospital of Zhengzhou University, No. 1 East Jianshe Road, Zhengzhou, 450052, China

Email: yjyangjj@163.com

### **2.2 Recruiting site**

The First Affiliated Hospital of Zhengzhou University

## **3 Background**

Postoperative sleep disturbance (PSD), including sleep deprivation, circadian disruption, and abnormal architecture, frequently occurs in patients after surgery (1-3). PSD could lead to postoperative delirium and cognitive impairment, exacerbate acute postoperative pain, and delay postoperative recovery (2, 4-7). Pharmacological intervention such as short-acting non-benzodiazepine zolpidem and melatonin has been often used to treat postoperative sleep quality (8). However, there are no studies reporting prophylactic effects for PSD.

(*R,S*)-ketamine, an *N*-methyl-D-aspartate receptor (NMDAR) antagonist, is a racemic mixture of equal amounts of (*R*)-ketamine (or arketamine) and (*S*)-ketamine (or esketamine), with esketamine having greater affinity for the NMDA receptor (9,10). Subanesthetic dose of (*R,S*)-ketamine (0.5 mg/kg, 40-min intravenous infusion) is well known to produce rapid-acting and sustained antidepressant actions in treatment-resistant patients with major depressive disorder (MDD) (11,12). Esketamine for anesthesia has been used some countries including China. Subanesthetic dose (0.2 and 0.4 mg/kg, intravenous infusion) of esketamine has been demonstrated rapid and robust antidepressant efficacy in treatment resistant patients with MDD although transient psychotomimetic and dissociative side effects were shown after infusion (13).

PSD is often shown with depression in postoperative patients (14-17). In addition to antidepressant actions, infusion of (*R,S*)-ketamine could improve the sleep disturbance in MDD patients with a sleep problem, suggesting potential of (*R,S*)-ketamine for sleep disturbance (18-20). It is suggested that antidepressant effects of (*R,S*)-ketamine are connected with the neurobiology of wake, sleep, and circadian rhythms (21). However, it is unknown whether intravenous infusion of low dose of esketamine intraoperatively can reduce the incidence of PSD in patient with surgery.

## **4 Study hypotheses**

The following hypotheses will be tested:

H1: There is a significant difference in the incidence of PSD on POD 1 and POD 3 in patient with surgery between the ketamine group and the control group.

H0: There is no difference in the incidence of PSD on POD 1 and POD 3 in patient with surgery between the ketamine group and the control group.

134

## 135 **5 Methodology**

### 136 **5.1 Study design**

137 This is a single-center, double-blind, randomized controlled trial in the First Affiliated Hospital of  
138 Zhengzhou University in China. Participants who underwent gynecological laparoscopic surgery will  
139 be randomized into esketamine group or control group (saline) in a 1:1 ratio.

140

### 141 **5.2 Randomization and blinding**

142 The blocked randomization sequence will be computer-generated by an independent researcher  
143 (Cai-Bao Yue, the First Affiliated Hospital of Zhengzhou University in China), who is not involved in  
144 the implementation and statistical analysis of the trial. For allocation concealment, assignments were  
145 concealed in sealed envelopes, which were sequentially handed to a nurse who was not involved in the  
146 study. When eligible patients are enrolled into the trial, envelopes will be successively opened by the  
147 nurse. Both esketamine and saline were prepared in identical 20-mL syringes by the same nurse.  
148 Anesthesiologists involved in the patient management and had participated in the postoperative  
149 follow-up were blinded to the group assignment. Esketamine (50 mg) was diluted to a total of 20 mL  
150 with saline solution. Group assignments were not revealed until patients were discharged from the  
151 hospital.

152

### 153 **5.3 Sample size**

154 In this study, the estimated sample size was calculated based on the results of our preliminary study,  
155 wherein the incidence of PSD was 40% in gynecological laparoscopic surgery. The expected effect  
156 size was calculated to detect a 50% incidence reduction in PSD after surgery with a two-sided  $\alpha = 0.05$   
157 with 80% power; 164 patients were needed. Considering the possibility of loss to follow-up or consent  
158 withdrawals, the recruitment goal was set at 184 patients.

159

### 160 **5.4 Participant recruitment, screening and group assignment**

161 Participants (ASA I-III) who underwent gynecological laparoscopic surgery will be recruited at the  
162 First Affiliated Hospital of Zhengzhou University in China. Written informed consent will be provided  
163 by each patient before the enrollment. Enrolled patients were randomly assigned to esketamine group  
164 or control group in a 1:1 ratio. The evaluators will record the data on the electronic case report through  
165 the whole trial period. The participant flow was shown in Figure 1 and Figure 2. The ethics boards of  
166 The First Affiliated Hospital of Zhengzhou University have approved this study.

| Trial procedure:                                                                                        |                                                                                                                                        |                                                                                                                                                                                                                        |
|---------------------------------------------------------------------------------------------------------|----------------------------------------------------------------------------------------------------------------------------------------|------------------------------------------------------------------------------------------------------------------------------------------------------------------------------------------------------------------------|
| Preoperative period                                                                                     | Intraoperative period                                                                                                                  | Postoperative period                                                                                                                                                                                                   |
| <b>Preoperative visit:</b><br>1. Assess sleep quality scores<br>2. Assess anxiety and depression scores | <b>Anesthesia induction:</b><br>1. Etomidate i. v. (0.2 mg/kg)<br>2. Alfentanil i. v. (40-50 µg/kg)<br>3. Rocuronium i. v. (0.9 mg/kg) | <b>Anesthesia maintenance:</b><br>1. 2% sevoflurane in 50% O <sub>2</sub> inhalation (2 L/min)<br>2. Remifentanyl infusion (0.1-0.2 µg/kg/min)<br>3. Esketamine or saline infusion (0.3 mg/kg/h)                       |
|                                                                                                         |                                                                                                                                        | <b>Postoperative pain management:</b><br>PCIA with hydromorphone (0.2 mg/kg)                                                                                                                                           |
|                                                                                                         |                                                                                                                                        | <b>Postoperative follow up:</b><br>1. Assess pain scores at 24 h and 48 h postoperatively<br>2. Assess sleep quality and the incidence of PSD on POD 1 and 3<br>3. Assess anxiety and depression scores on POD 1 and 3 |

Figure 1. Procedure of management and visit

167

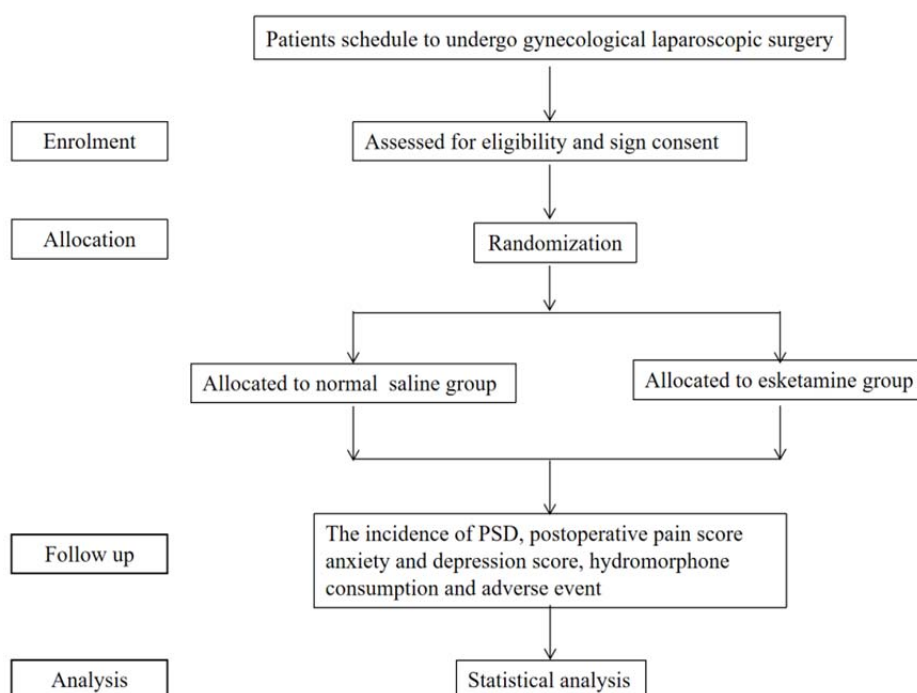

Figure 2 | The Flow diagram

168

169

170 **5.5 Inclusion criteria**

171 Participants will be included in the study if they meet the following criteria.

- 172 1) Age 18 to 65 years.
- 173 2) American Society of Anesthesiologists Physical Status I-III.
- 174 3) BMI 18-30 kg/m<sup>2</sup>.
- 175 4) Schedule to undergo gynecological laparoscopic surgery.

176 **5.6 Exclusion criteria**

177 Participants will be excluded from the study if they met the following criteria.

- 178 1) Patient refusal to participate in the study.  
179 2) Body mass index (BMI) > 30 kg/m<sup>2</sup>.  
180 3) Preoperative Pittsburgh Sleep Quality Index (PSQI) > 7.  
181 4) Recent history of drug abuse.  
182 5) Contraindications or allergic to esketamine.  
183 6) Cognitive dysfunction or unable to communicate.  
184 7) Inability to use patient-controlled intravenous analgesia (PCIA).

185

## 186 **6 Outcome measurement**

### 187 **6.1 Primary outcome**

188 The primary outcome was the incidence of PSD on postoperative days 1 and 3. The PSD is defined as  
189 Numerical Rating Scale (NRS)  $\geq 6$  or Athens Insomnia Scale (AIS)  $\geq 6$ , indicating that sleep is  
190 repeatedly interrupted throughout the night, or even worse. The AIS consists of 8 items—waking up at  
191 night, sleep induction, final awakening, total sleep duration, sleep quality, well-being, functional  
192 ability, and daytime sleepiness.

193

### 194 **6.2 Secondary outcomes**

195 1. Postoperative pain score at 24h and 48h after surgery, assessed using the visual analogue scale  
196 (VAS), this is a scale ranging from one to ten, in which one indicates ‘no pain’ and ten indicates  
197 ‘Unbearable pain’.

198 2. Anxiety and depression score on 1 day before surgery, postoperative day 1 and 3, measured using  
199 the Hospital Anxiety and Depression Scale (HADS), which composed of 14 questions with 7 items  
200 each for anxiety and depression. Scores  $\geq 8$  are considered positive for both depression and anxiety  
201 scales.

202 3. Postoperative hydromorphone consumption in the first 24 h and total consumption within 48 h as  
203 well as postoperative complications including postoperative nausea and vomiting, dizziness, itching,  
204 and nightmare.

205 4. Other outcomes including demographic information such as age, height, BMI, ASA classification,  
206 smoking, drinking alcohol and comorbidities; and intraoperative information such as surgery and  
207 anesthesia duration, laryngeal mask removal time, infusion volume, estimated blood loss and urine  
208 output.

209

## 210 **7 Interventions**

211 Patients in both esketamine group and control group will receive similar intraoperative monitoring and  
212 anesthesia management. Patients in esketamine group will receive a continuous infusion of esketamine  
213 (0.3 mg/kg/h) intraoperatively, and patients in control group will receive an equivalent volume of  
214 saline.

215

## 216 **8 Anesthesia Technique**

217 Routine intraoperative monitoring was established including pulse oximetry, electrocardiography and  
218 noninvasive blood pressure. Anesthesia was induced with etomidate (0.2 mg/kg), alfentanil (40-50

219 µg/kg), followed by rocuronium (0.9 mg/kg) to facilitate the insertion of laryngeal mask airway  
220 (Ambu AuraGain, Baltorpbakken, Denmark). Anesthesia was maintained with remifentanyl (0.1-0.2  
221 µg/kg/min) and 2% sevoflurane in 50% O<sub>2</sub> (2 L/min), and the remifentanyl infusion rate was titrated  
222 to keep heart rate and arterial blood pressure within 20% of baseline. Maintain  
223 end-tidal carbon dioxide partial pressure between 35-45mmHg. Palonosetron (0.25 mg) was injected  
224 intravenously at the end of surgery for prevention of postoperative nausea and vomiting. After  
225 completing surgery, the laryngeal mask was pulled out when adequate muscle strength was established.  
226 Postoperative pain was managed using hydromorphone (0.2 mg/kg in 200 ml saline) by PCIA pump:  
227 background infusion 2 ml/h for 48 h, bolus 2 ml, lockout time 10 min. Flurbiprofen axetil (50 mg) was  
228 intravenously administered as a rescue analgesic to patients if the pain scores >4.

229

## 230 **9 Quality control**

231 Both paper files and electronic documents will be preserved for at least 5 years after publication. If  
232 readers have any questions, they can contact the corresponding author for access to the original data.  
233 Patient information will remain anonymous, including name, ID number and telephone number. The  
234 protocol will be reviewed and revised by experts in anesthesia management and statistics. We will  
235 perform a pre-specified standard operating procedure, which includes screening patients, improve  
236 relevant management, and standardize the follow-up visit, assessing outcomes and data management.  
237 The ethics committee of The First Affiliated Hospital of Zhengzhou University will audit trial conduct  
238 per 12 months.

239

## 240 **10 Statistical analysis**

241 Patients' baseline characteristics will be summarized based on groups. Continuous variables will be  
242 described using the mean (standard deviation), or the median (interquartile range) if the normality  
243 assumption is violated. Student's t test or Mann-Whitney U test (if normality is violated) will be used  
244 for comparison of continuous variables among the two groups. Categorical variables will be described  
245 using the frequency (percentage) and compared using the chi-squared test or Fisher exact test, as  
246 appropriate.

247 For the primary comparison, the chi-squared test will be used for the incidence of postoperative sleep  
248 disturbance. For the secondary outcomes, Student's t test, Chi-squared test, Fisher's exact test or the  
249 Mann-Whitney U test will be used to test the difference of the outcomes including postoperative pain  
250 score, anxiety and depression score, postoperative hydromorphone consumption and adverse events,  
251 between groups according to the distribution of variables. There is no interim analysis or additional  
252 analysis in this trial.

253 All efficacy analyses will be performed using the per-protocol, which includes all randomized patients  
254 except for one missing data. All analyses will be performed using SPSS version 21.0 (IBM SPSS  
255 Statistics, USA).

256 The level of significance will be established at  $\alpha < 0.05$  with a two-sided test.

257

## 258 **References**

259 1. Gögenur I, Wildschjötz G, Rosenberg J: Circadian distribution of sleep phases after major



- 260 abdominal surgery. *Br J Anaesth* 2008; 100(1):45-49.
- 261 2. Chouchou F, Khoury S, Chauny J M, et al: Postoperative sleep disruptions: a potential catalyst of  
262 acute pain? *Sleep Med Rev* 2014; 18(3):273-282.
- 263 3. Su X, Wang DX: Improve postoperative sleep: what can we do? *Curr Opin Anaesthesiol* 2018;  
264 31(1):83-88.
- 265 4. Lu Y, Li YW, Wang L, et al: Promoting sleep and circadian health may prevent postoperative  
266 delirium: A systematic review and meta-analysis of randomized clinical trials. *Sleep Med Rev*  
267 2019; 48:101207.
- 268 5. Wang X, Hua D, Tang X, et al: The role of perioperative sleep disturbance in postoperative  
269 neurocognitive disorders. *Nat Sci Sleep* 2021; 13:1395-1410.
- 270 6. O'gara BP, Gao L, Marcantonio ER, et al: Sleep, pain, and cognition: modifiable targets for  
271 optimal perioperative brain health. *Anesthesiology* 2021; 135(6):1132-1152.
- 272 7. Ibala R, Mekonnen J, Gitlin J, et al: A polysomnography study examining the association  
273 between sleep and postoperative delirium in older hospitalized cardiac surgical patients. *J Sleep*  
274 *Res* 2021; 30(5):e13322.
- 275 8. Luo M, Song B, Zhu J: Sleep disturbances after general anesthesia: current perspectives. *Front*  
276 *Neurol* 2020; 11:629.
- 277 9. Hashimoto K: Molecular mechanisms of the rapid-acting and long-lasting antidepressant actions  
278 of (R)-ketamine. *Biochem Pharmacol* 2020; 177:113935.
- 279 10. Wei Y, Chang L, Hashimoto K: Molecular mechanisms underlying the antidepressant actions of  
280 arketamine: beyond the NMDA receptor. *Mol Psychiatry* 2022; 27(1):559-573.
- 281 11. Zarate CA Jr, Singh JB, Carlson PJ, et al: A randomized trial of an N-methyl-D-aspartate  
282 antagonist in treatment-resistant major depression. *Arch Gen Psychiatry* 2006; 63(8):856-864.
- 283 12. Murrrough JW, Iosifescu DV, Chang LC, et al: Antidepressant efficacy of ketamine in  
284 treatment-resistant major depression: a two-site randomized controlled trial. *Am J Psychiatry*  
285 2013; 170(10):1134-42.
- 286 13. Singh JB, Fedgchin M, Daly E, et al: Intravenous esketamine in adult treatment-resistant  
287 depression: A double-blind, double-randomization, placebo-controlled study. *Biol Psychiatry*  
288 2016; 80(6):424-431.
- 289 14. Wichniak A, Wierzbicka A, Jernajczyk W: Sleep as a biomarker for depression. *Int Rev*  
290 *Psychiatry* 2013; 25(5):632-645.
- 291 15. Asarnow LD: Depression and sleep: what has the treatment research revealed and could the HPA  
292 axis be a potential mechanism? *Curr Opin Psychol* 2020; 34:112-116.
- 293 16. Liverant GI, Arditte Hall KA, Wieman ST, et al: Associations between insomnia and reward  
294 learning in clinical depression. *Psychol Med* 2021 Feb 26;1-10. doi:  
295 10.1017/S003329172100026X.
- 296 17. Lee MJ, Nho WY, Jung H, et al: High prevalence of depression and sleep-wake disorders among  
297 female emergency medicine residents in South Korea. *Ann Med* 2022; 54(1):846-855.
- 298 18. Wang M, Zhang B, Zhou Y, et al: Sleep improvement is associated with the antidepressant  
299 efficacy of repeated-dose ketamine and serum BDNF levels: a post-hoc analysis. *Pharmacol Rep*  
300 2021; 73(2):594-603.

- 301 19. Song B, Zhu JC: Mechanisms of the rapid effects of ketamine on depression and sleep  
302 disturbances: A narrative review. *Front Pharmacol* 2021; 12:782457.
- 303 20. Song B, Zhu J: A novel application of ketamine for improving perioperative sleep disturbances.  
304 *Nat Sci Sleep* 2021; 13:2251-2266.
- 305 21. Kohtala S, Alitalo O, Rosenholm M, et al: Time is of the essence: Coupling sleep-wake and  
306 circadian neurobiology to the antidepressant effects of ketamine. *Pharmacol Ther* 2021;  
307 221:107741.
