# Supplementary material for: Effect of Intraoperative Esketamine Infusion on Postoperative Sleep Disturbance After Gynecological Laparoscopy: A Randomized Clinical Trial
Source: PubMed Central journal article supplement (PMC9716381; doi:10.1001/jamanetworkopen.2022.44514), 2022-12-01
Supplement: jamanetwopen-e2244514-s002.pdf [file jamanetwopen-e2244514-s002.pdf]

## Supplemental Online Content

Qiu D, Wang XM, Yang JJ, et al. Effect of intraoperative esketamine infusion on postoperative sleep disturbance after gynecological laparoscopy: a randomized clinical trial. *JAMA Netw Open*. 2022;5(12):e2244514. doi:10.1001/jamanetworkopen.2022.44514

**eTable 1.** Perioperative Data

**eTable 2.** Pain Scores and Opioid Consumption at 24 h and 48 h Postoperatively

**eTable 3.** Postoperative Complications on POD 1 and 3

This supplemental material has been provided by the authors to give readers additional information about their work.

**eTable 1.** Perioperative Data

|                                                            | Control Group,<br>median (IQR, n=91) | Esketamine Group,<br>median (IQR, n=92) | <i>P</i> |
|------------------------------------------------------------|--------------------------------------|-----------------------------------------|----------|
| Duration of anesthesia (min)                               | 110 (90, 143)                        | 121 (100, 142)                          | 0.09     |
| Duration of surgery (min)                                  | 85 (67, 114)                         | 95 (75.5, 118.5)                        | 0.06     |
| Remifentanil dosage ( $\mu\text{g}/\text{kg}/\text{min}$ ) | 0.15 (0.13, 0.17)                    | 0.14 (0.12, 0.16)                       | 0.003    |
| Infusion volume (mL)                                       | 1300 (1000, 1500)                    | 1300 (1025, 1500)                       | 0.68     |
| Estimated blood loss (mL)                                  | 30 (20, 30)                          | 30 (20, 30)                             | 0.12     |
| Urine volume (mL)                                          | 150 (80, 200)                        | 150 (100, 287.5)                        | 0.21     |
| Laryngeal mask removal time (min)                          | 10 (8, 14)                           | 14 (8, 20)                              | 0.01     |
| Time in PACU (min)                                         | 32 (30, 34)                          | 36 (32, 40)                             | < 0.001  |

Data presented as median (interquartile range, IQR) were compared using the Mann–Whitney U test or Fisher exact test.

Abbreviations: PACU, postanesthesia care unit.

**eTable 2.** Pain Scores and Opioid Consumption at 24 h and 48 h Postoperatively

|                                | Control group,<br>median (IQR, n=91) | Esketamine group<br>median (IQR, n=92) | <i>P</i> |
|--------------------------------|--------------------------------------|----------------------------------------|----------|
| 24 h postoperatively           |                                      |                                        |          |
| VAS (R)                        | 3 (2, 3)                             | 2 (1, 3)                               | 0.09     |
| VAS (M)                        | 4 (3, 5)                             | 3 (3, 4)                               | <0.001   |
| Hydromorphone consumption (mg) | 3.2 (2.9, 3.4)                       | 3.0 (2.8, 3.3)                         | 0.04     |
| 48 h postoperatively           |                                      |                                        |          |
| VAS (R)                        | 1 (1, 2)                             | 1 (1, 2)                               | 0.14     |
| VAS (M)                        | 3 (2, 3)                             | 2 (2, 3)                               | 0.002    |
| Hydromorphone consumption (mg) | 6.1 (5.7, 6.7)                       | 5.9 (5.5, 6.5)                         | 0.13     |

Data presented as median (interquartile range, IQR) were compared using the Mann–Whitney U test.

Abbreviations: VAS(R), Visual Analog Scale at rest; VAS(M), Visual Analog Scale on movement.

**eTable 3.** Postoperative Complications on POD 1 and 3

|                            | Control Group,<br>(n=91) | Esketamine Group,<br>(n=92) | <i>P</i> |
|----------------------------|--------------------------|-----------------------------|----------|
| <b>POD 1</b>               |                          |                             |          |
| Nausea and vomiting, n (%) | 27 (29.7)                | 34 (37.0)                   | 0.32     |
| Dizziness, n (%)           | 48 (52.7)                | 51 (55.4)                   | 0.78     |
| Itching, n (%)             | 1 (0)                    | 0 (0)                       | 1        |
| Nightmare, n (%)           | 0 (0)                    | 1 (0)                       | 1        |
| <b>POD 3</b>               |                          |                             |          |
| Nausea and vomiting, n (%) | 5 (5.5)                  | 5 (5.4)                     | 1        |
| Dizziness, n (%)           | 12 (13.2)                | 9 (9.8)                     | 0.50     |
| Itching, n (%)             | 0 (0)                    | 0 (0)                       | 1        |
| Nightmare, n (%)           | 0 (0)                    | 0 (0)                       | 1        |

Data presented as the number of patients (%) were compared using the Pearson chi-square test or Fisher exact test.

Abbreviations: POD 1, postoperative day 1; POD 3, postoperative day 3.
