# Supplementary material for: Effect of Intraoperative Esketamine Infusion on Postoperative Sleep Disturbance After Gynecological Laparoscopy: A Randomized Clinical Trial
Source: PubMed Central journal article supplement (PMC9716381; doi:10.1001/jamanetworkopen.2022.44514), 2022-12-01
Supplement: jamanetwopen-e2244514-s003.pdf [file jamanetwopen-e2244514-s003.pdf]

## Data Sharing Statement

Qiu. Effect of Intraoperative Esketamine Infusion on Postoperative Sleep Disturbance After Gynecological Laparoscopy. *JAMA Netw Open*. Published December 01, 2022.  
doi:10.1001/jamanetworkopen.2022.44514

### Data

**Data available:** No
